# Supplementary material
Source: PubMed Central journal article supplement (PMC1265854)
Supplement: JCI0524196sd.pdf [file JCI0524196sd.pdf]

Supplemental Table 1. Primer sequences used for real time quantitative RT-PCR

| <b>Gene</b>    | <b>Primer sequence</b>                                                             | <b>Product size (bp)</b> |
|----------------|------------------------------------------------------------------------------------|--------------------------|
| PGC-1          | Forward: 5' GAAAACAGGAACAGCAGCAGAGAC 3'<br>Reverse: 5'GGGGTCAGAGGAAGAGATAAAGTTG 3' | 113                      |
| PEPCK          | Forward: 5' GCATAACTAACCCCGAAGGCAAG 3'<br>Reverse: 5' CATCCAGGCAATGTCATCGC 3'      | 140                      |
| G6Pase         | Forward: 5' CAGAATGGGTCCACCTTGACAC 3'<br>Reverse: 5' AGCGGAATGGGAGCAACTTG 3'       | 144                      |
| CREB           | Forward: 5' CATTGCCCTGGAGTTGTTATG 3'<br>Reverse: 5' TCTACGACATTCTTTGCTGCCTC 3'     | 124                      |
| FAS            | Forward: 5' AAGTTGCCCGAGTCAGAGAACC 3'<br>Reverse: 5' ATCCATAGAGCCCAGCCTTCCATC 3'   | 106                      |
| CPT-1a         | Forward: 5' ATGGCAGAGGCTCACCAAGC 3'<br>Reverse: 5' GATGAACTTCTTCTTCCAGGAGTGC 3'    | 132                      |
| AOX            | Forward: 5' GCTCAGCAGGAGAAATGGATGC 3'<br>Reverse: 5' AATGAACTCTTGGGTCTTGGGG 3'     | 141                      |
| MCAD           | Forward: 5' CCCGTTCCCTCTCATCAAAG 3'<br>Reverse: 5' ACACCCATACGCCAACTCTTCG 3'       | 130                      |
| SREBP-1        | Forward: 5' AAGCAAATCACTGAAGGACCTGG 3'<br>Reverse: 5' AAAGACAAGGGGCTACTCTGGGAG 3'  | 150                      |
| FOXO1          | Forward: 5' TACGAGTGGATGGTGAAGAGCG 3'<br>Reverse: 5' TGAAGGGACAGATTGTGGCG 3'       | 101                      |
| PPAR $\gamma$  | Forward: 5' TTCCGAAGAACCATCCGATTG 3'<br>Reverse: 5' TGGCATTGTGAGACATCCCCAC 3'      | 136                      |
| $\beta$ -actin | Forward: 5' GACCTCTATGCCACACAGT 3'<br>Reverse: 5' TAGGAGCCAGAGCAGTAATA             | 100                      |
